# Supplementary material for: Investigating agglomeration and dissolution of silica nanoparticles in aqueous suspensions by dynamic reaction cell inductively coupled plasma-mass spectrometry in time resolved mode
Source: Royal Society of Chemistry journal article supplement (doi:10.1039/c2ja30133d), 2012-01-01

## **Electronic Supplementary Information**

**Investigating agglomeration and dissolution of silica nanoparticles in aqueous suspensions by dynamic reaction cell inductively coupled plasma-mass spectrometry in time resolved mode**

Federica Aureli, Marilena D'Amato, Barbara De Berardis, Andrea Raggi, Anna Chiara Turco,  
Francesco Cubadda

**SEM images of agglomerates observed in NM-201 (a) and NM-203 (b):**

(a)

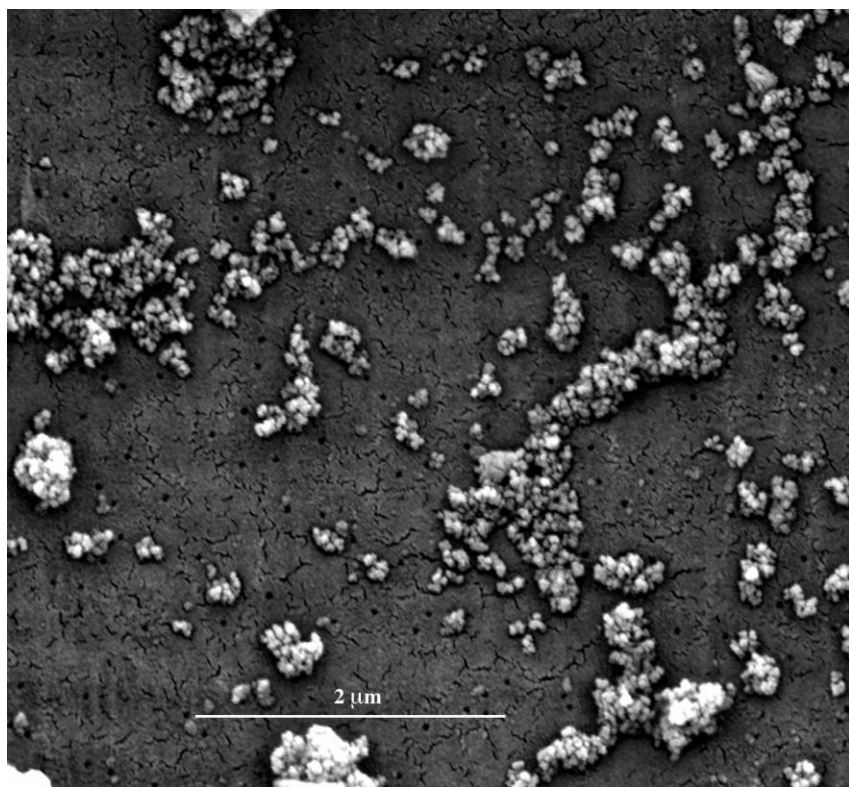

(b)

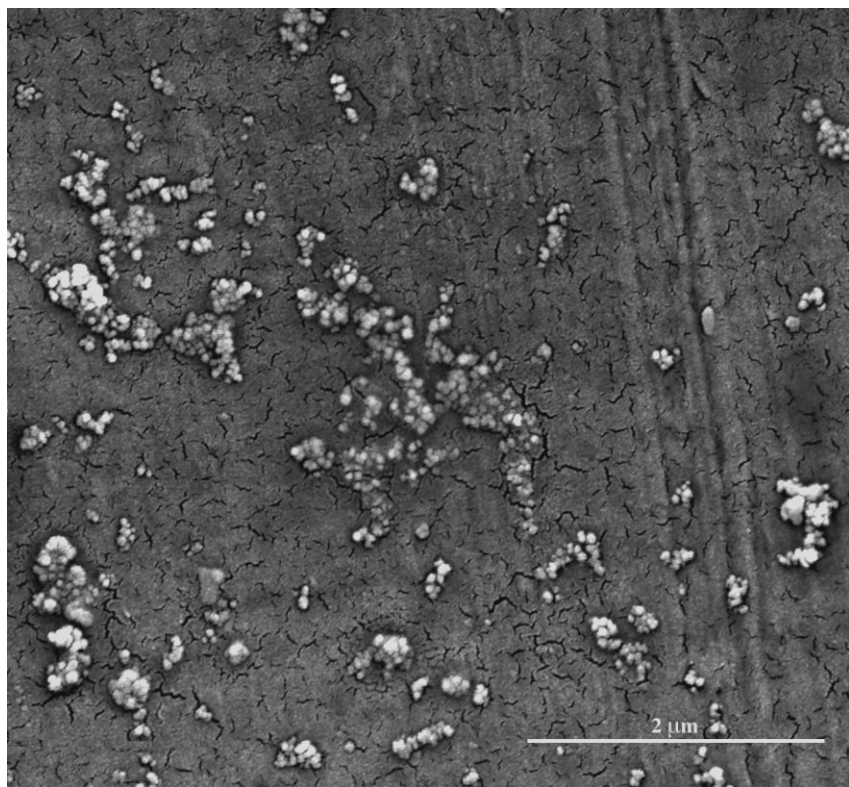

Supplement: c2ja30133d.pdf [file c2ja30133d.pdf]
